# Supplementary material for: A quaternary solid-form of ritonavir: an oxalate salt oxalic acid co-crystal acetone solvate
Source: Royal Society of Chemistry journal article supplement (doi:10.1039/d2ce01612e), 2023-01-01
Supplement: d2ce01612e1.pdf [file d2ce01612e1.pdf]

## Supplementary Information

### **A Quaternary Solid-form of Ritonavir: an Oxalate Salt Oxalic Acid Co-crystal Acetone Solvate**

Chang Wang<sup>2,1</sup>, Thomas D. Turner<sup>1,\$,\*</sup>, Cai Y. Ma<sup>1</sup>, Christopher M. Pask<sup>3</sup>, Ian Rosbottom<sup>1</sup>, Richard S. Hong<sup>4</sup>, Ahmad Sheikh<sup>4</sup>, Qiuxiang Yin<sup>2</sup> and Kevin. J. Roberts<sup>1</sup>

<sup>1</sup> Centre for the Digital design of Drug Products, School of Chemical and Process Engineering, University of Leeds, Woodhouse Lane, Leeds, LS2 9JT, UK.

<sup>2</sup> School of Chemical Engineering and Technology, State Key Laboratory of Chemical Engineering, Tianjin University, Tianjin 300072, China.

<sup>3</sup> School of Chemistry, University of Leeds, Woodhouse Lane, Leeds, LS2 9JT, UK.

<sup>4</sup> Solid State Chemistry, Process R&D, AbbVie Inc., North Chicago, IL, 60064, USA.

Current address:

<sup>\$</sup> School of Chemistry, University of Leeds, Woodhouse Lane, Leeds, LS2 9JT, UK.

\* Corresponding Author

This supplementary material supports the main manuscript by providing further details of the following; **Figure S1** presents DSC thermograms for ritonavir forms I and II. **Figure S1** shows the optical micrograph of a single crystal of the new oxalate salt form as mounted upon the single crystal XRD system with the identified orientation of the crystallographic axes. **Figure S3** defines the atom labelling system for the forms I, II, IIIb and the new salt form. **Figure S4** highlights key torsion angle differences between Forms I, II, IIIb and the new salt form with the “folding” ritonavir molecular conformation leading to two thiazole groups “stacking” in the new salt form. **Figure S5** shows a comprehensive comparison of 16 torsion angles which show large differences between forms I, II, IIIb and the new salt form. **Figure S6** shows the major hydrogen bonding motifs of ritonavir form IIIb and the new salt form. **Figure S7** shows molecular overlays of ritonavir forms I, II, IIIb and the new salt form to visualise the impact of different molecular conformations. **Table S1** shows the conformation angle data for the 16 torsions highlighted in **Figure S5**. **Table S2** provides a calculation of the  $\Delta pK_a$ s for various functional groups in the ritonavir molecule from DFT calculations.

#### S1. Solid Form Characterisation: DSC experimental results of ritonavir forms I and II

The melting points (**Figure S1**) of forms I and II obtained in this study by DSC experiments were found to be consistent with literature <sup>1</sup>.

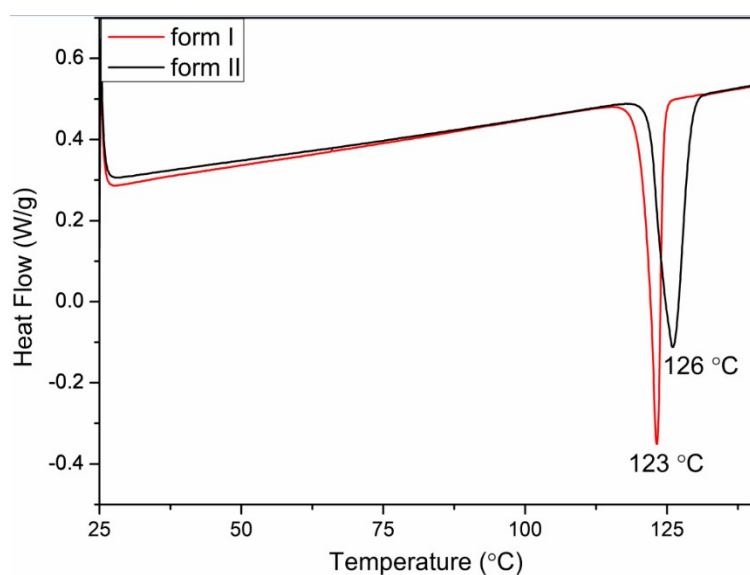

**Figure S1.** DSC thermograms of ritonavir forms I and II for their melting points.

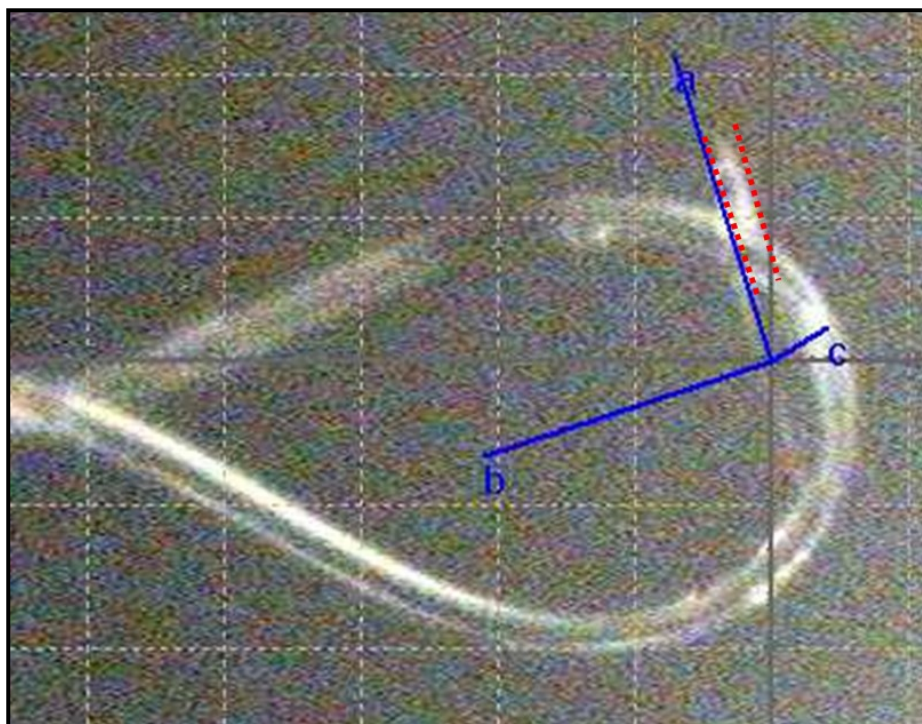

**Figure S2.** Optical micrograph of a single crystal of the new oxalate salt form as mounted upon the single crystal XRD system with the identified orientation of the crystallographic axes.

**S2.** Crystal Structure: Atom labelling systems for ritonavir forms I, II, IIIb and the new salt form

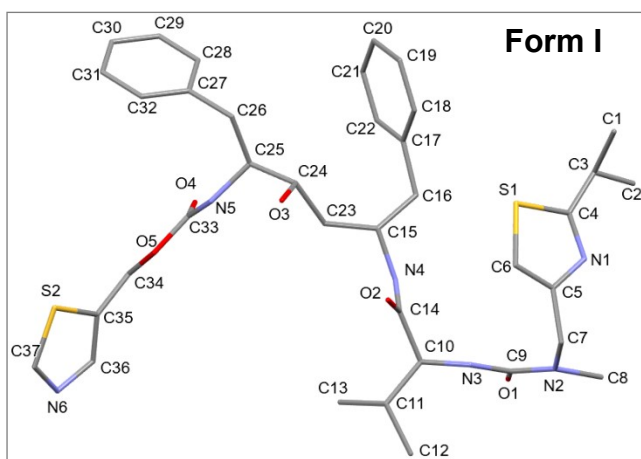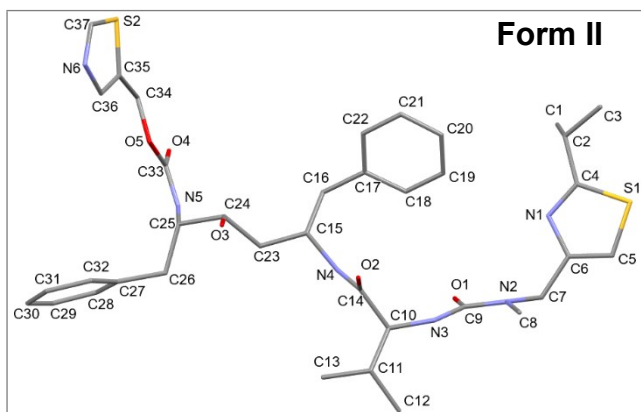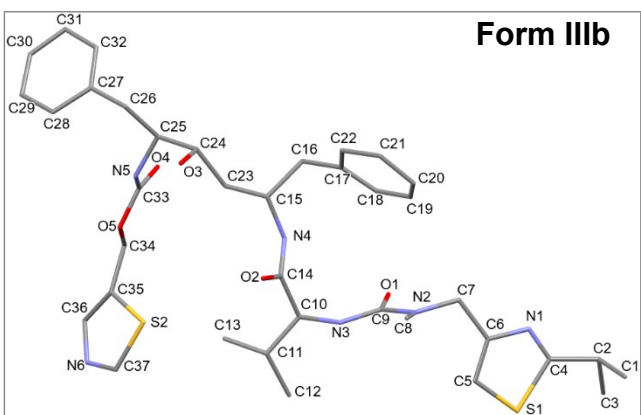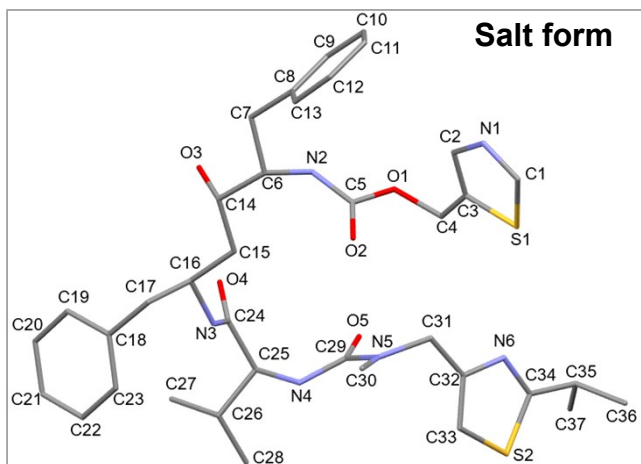

| Atom labelling                           |                                           |                                           |                                             |
|------------------------------------------|-------------------------------------------|-------------------------------------------|---------------------------------------------|
| Form I <sup>1</sup> (Bauer et al., 2001) | Form II <sup>1</sup> (Bauer et al., 2001) | Form IIIb <sup>2</sup> (Yao et al., 2022) | Oxalate Salt Form <sup>3</sup> (this study) |
| C1                                       | C3                                        | C1                                        | C37                                         |
| C2                                       | C1                                        | C3                                        | C36                                         |
| C3                                       | C2                                        | C2                                        | C35                                         |
| C4                                       | C4                                        | C4                                        | C34                                         |
| C5                                       | C6                                        | C6                                        | C32                                         |
| C6                                       | C5                                        | C5                                        | C33                                         |
| C7                                       | C7                                        | C7                                        | C31                                         |
| C8                                       | C8                                        | C8                                        | C30                                         |
| C9                                       | C9                                        | C9                                        | C29                                         |
| C10                                      | C10                                       | C10                                       | C25                                         |
| C11                                      | C11                                       | C11                                       | C26                                         |
| C12                                      | C12                                       | C12                                       | C28                                         |
| C13                                      | C13                                       | C13                                       | C27                                         |
| C14                                      | C14                                       | C14                                       | C24                                         |
| C15                                      | C15                                       | C15                                       | C16                                         |
| C16                                      | C16                                       | C16                                       | C17                                         |
| C17                                      | C17                                       | C17                                       | C18                                         |
| C18                                      | C18                                       | C18                                       | C19                                         |
| C19                                      | C19                                       | C19                                       | C20                                         |
| C20                                      | C20                                       | C20                                       | C21                                         |
| C21                                      | C21                                       | C21                                       | C22                                         |
| C22                                      | C22                                       | C22                                       | C23                                         |
| C23                                      | C23                                       | C23                                       | C15                                         |
| C24                                      | C24                                       | C24                                       | C14                                         |
| C25                                      | C25                                       | C25                                       | C6                                          |
| C26                                      | C26                                       | C26                                       | C7                                          |
| C27                                      | C27                                       | C27                                       | C8                                          |
| C28                                      | C28                                       | C28                                       | C9                                          |
| C29                                      | C29                                       | C29                                       | C10                                         |
| C30                                      | C30                                       | C30                                       | C11                                         |
| C31                                      | C31                                       | C31                                       | C12                                         |
| C32                                      | C32                                       | C32                                       | C13                                         |
| C33                                      | C33                                       | C33                                       | C5                                          |
| C34                                      | C34                                       | C34                                       | C4                                          |
| C35                                      | C35                                       | C35                                       | C3                                          |
| C36                                      | C36                                       | C36                                       | C2                                          |
| C37                                      | C37                                       | C37                                       | C1                                          |
| N1                                       | N1                                        | N1                                        | N6                                          |
| N2                                       | N2                                        | N2                                        | N5                                          |
| N3                                       | N3                                        | N3                                        | N4                                          |
| N4                                       | N4                                        | N4                                        | N3                                          |
| N5                                       | N5                                        | N5                                        | N2                                          |
| N6                                       | N6                                        | N6                                        | N1                                          |
| O1                                       | O1                                        | O1                                        | O5                                          |
| O2                                       | O2                                        | O2                                        | O4                                          |
| O3                                       | O3                                        | O3                                        | O3                                          |
| O4                                       | O4                                        | O4                                        | O2                                          |
| O5                                       | O5                                        | O5                                        | O1                                          |
| S1                                       | S1                                        | S1                                        | S2                                          |
| S2                                       | S2                                        | S2                                        | S1                                          |

Figure S3. Molecular structures of ritonavir forms I<sup>1</sup>, II<sup>1</sup>, IIIb<sup>2</sup> & the new oxalate salt form (CCDC deposition

number 2009282) for atoms labelling comparisons.

### S3. Conformation Analysis

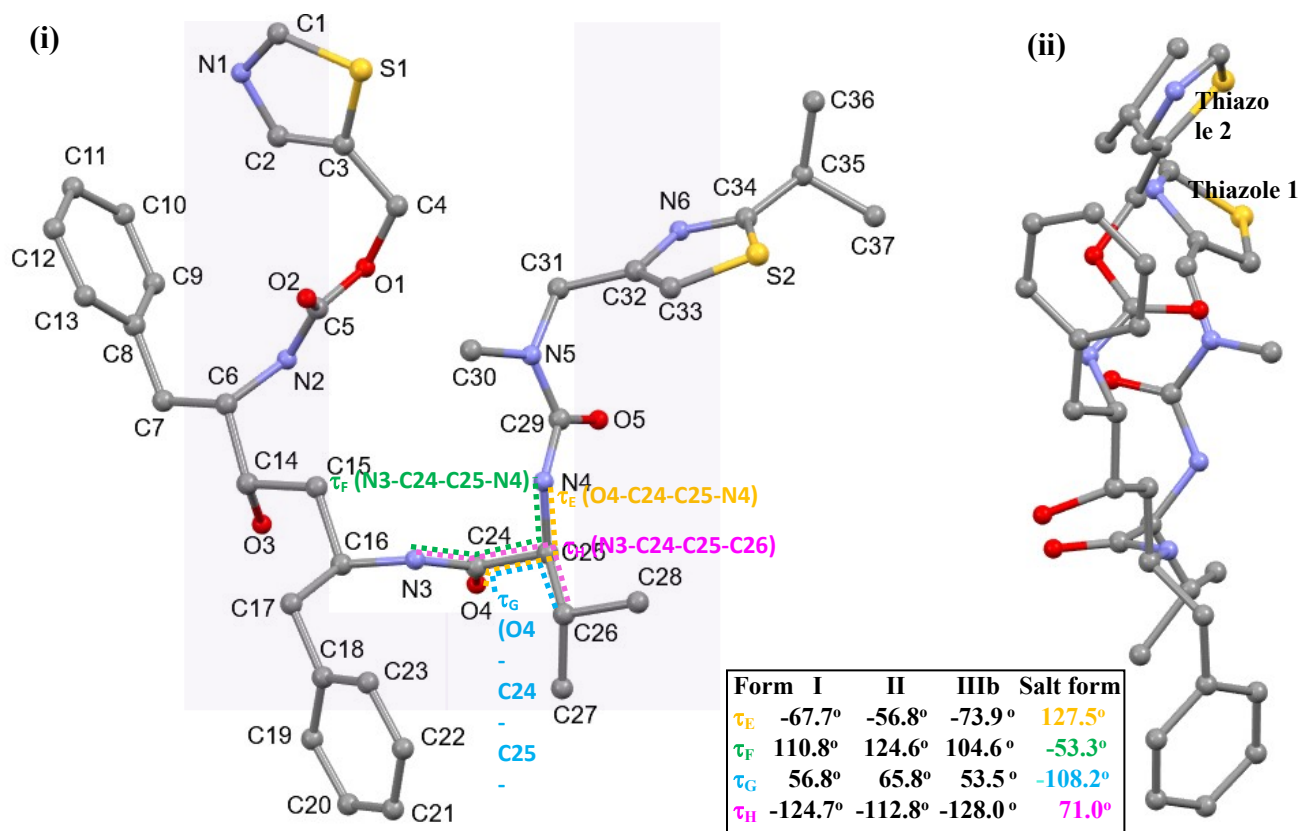

**Figure S4.** (i) The group of torsion angles in ritonavir oxalate salt form that causes about a 165° (comparing to form I) or 177° (comparing to form II) or 160° (comparing to form IIIb) rotation of the molecular fragments containing the phenyl–hydroxyl–phenyl–carbamate–thiazole<sub>1</sub> groups; (ii) The view from the left side of the ritonavir molecule in (a) with the two thiazole ring groups (1 and 2) tending to “stack” together.

|            |                     |                      |                        |                            |
|------------|---------------------|----------------------|------------------------|----------------------------|
| $\tau_A$ : | C7-N2-C9-N3 (I)     | C7-N2-C9-N3 (II)     | C7-N2-C9-N3 (IIIb)     | C31-N5-C29-N4 (salt - S)   |
| $\tau_B$ : | C23-C24-C25-N5 (I)  | C23-C24-C25-N5 (II)  | C23-C24-C25-N5 (IIIb)  | C15-C14-C6-N2 (salt - S)   |
| $\tau_C$ : | C25-N5-C33-O5 (I)   | C25-N5-C33-O5 (II)   | C25-N5-C33-O5 (IIIb)   | C6-N2-C5-O1 (salt - S)     |
| $\tau_D$ : | C23-C15-C16-C17 (I) | C23-C15-C16-C17 (II) | C23-C15-C16-C17 (IIIb) | C15-C16-C17-C18 (salt - S) |
| $\tau_E$ : | O2-C14-C10-N3 (I)   | O2-C14-C10-N3 (II)   | O2-C14-C10-N3 (IIIb)   | O4-C24-C25-N4 (salt - S)   |
| $\tau_F$ : | N3-C10-C14-N4 (I)   | N3-C10-C14-N4 (II)   | N3-C10-C14-N4 (IIIb)   | N4-C25-C24-N3 (salt - S)   |
| $\tau_G$ : | O2-C14-C10-C11 (I)  | O2-C14-C10-C11 (II)  | O2-C14-C10-C11 (IIIb)  | O4-C24-C25-C26 (salt - S)  |
| $\tau_H$ : | C11-C10-C14-N4 (I)  | C11-C10-C14-N4 (II)  | C11-C10-C14-N4 (IIIb)  | C26-C25-C24-N3 (salt - S)  |
| $\tau_I$ : | C5-C7-N2-C8 (I)     | C6-C7-N2-C8 (II)     | C5-C7-N2-C8 (IIIb)     | C32-C31-N5-C30 (salt - S)  |
| $\tau_J$ : | N1-C5-C7-N2 (I)     | N1-C6-C7-N2 (II)     | N1-C5-C7-N2 (IIIb)     | N6-C32-C31-N5 (salt - S)   |
| $\tau_K$ : | C6-C5-C7-N2 (I)     | C5-C6-C7-N2 (II)     | C6-C5-C7-N2 (IIIb)     | C33-C32-C31-N5 (salt - S)  |
| $\tau_L$ : | C2-C3-C4-S1 (I)     | C1-C2-C4-S1 (II)     | C2-C3-C4-S1 (IIIb)     | C36-C35-C34-S2 (salt - S)  |
| $\tau_M$ : | C2-C3-C4-N1 (I)     | C1-C2-C4-N1 (II)     | C2-C3-C4-N1 (IIIb)     | C36-C35-C34-N6 (salt - S)  |
| $\tau_N$ : | C18-C17-C16-C15 (I) | C18-C17-C16-C15 (II) | C18-C17-C16-C15 (IIIb) | C19-C18-C17-C16 (salt - S) |
| $\tau_O$ : | C22-C17-C16-C15 (I) | C22-C17-C16-C15 (II) | C22-C17-C16-C15 (IIIb) | C23-C18-C17-C16 (salt - S) |
| $\tau_P$ : | C33-O5-C34-C35 (I)  | C11-O5-C34-C35 (II)  | C33-O5-C34-C35 (IIIb)  | C5-O1-C4-C3 (salt - S)     |

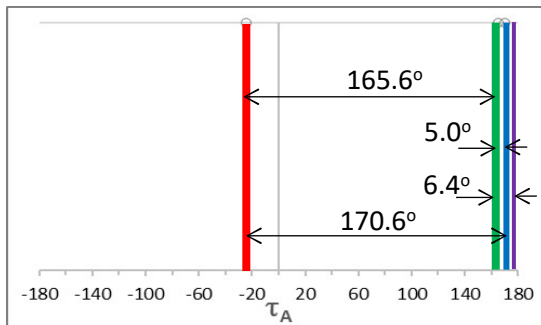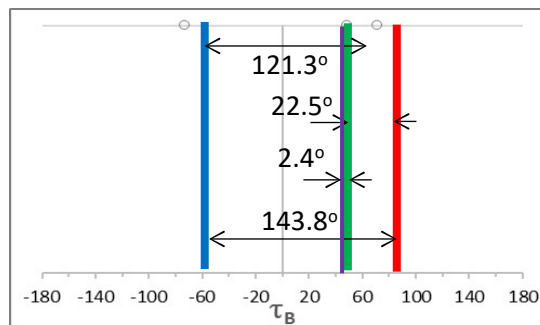

|                  | $\Delta(I-II)$ | $\Delta(I-S)$ | $\Delta(II-S)$ |
|------------------|----------------|---------------|----------------|
| $\Delta(IIIb-S)$ |                |               |                |
| $\tau_A$         | 170.6°         | 165.6°        | 5.0°           |
| $\tau_B$         | 143.8°         | 22.5°         | 121.3°         |

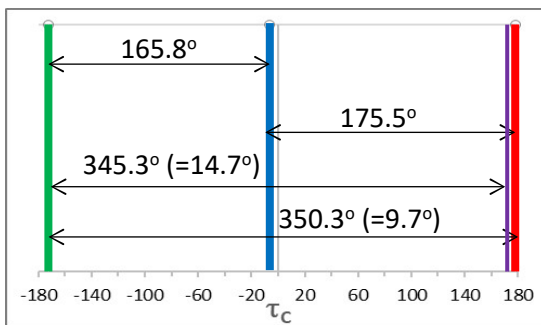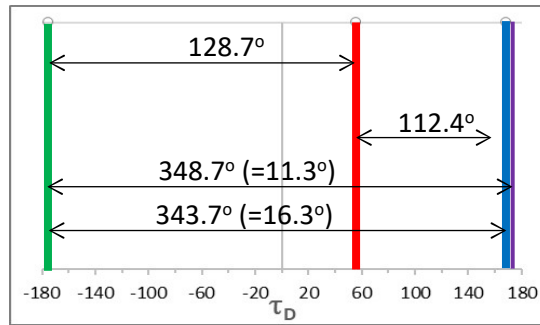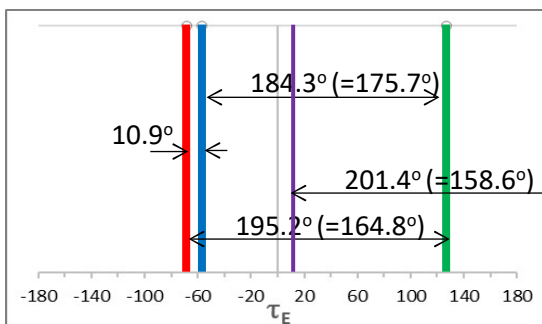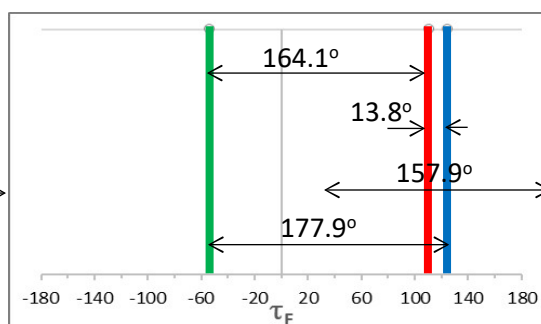

|                  | $\Delta(I-II)$ | $\Delta(I-S)$ | $\Delta(II-S)$ |
|------------------|----------------|---------------|----------------|
| $\Delta(IIIb-S)$ |                |               |                |
| $\tau_E$         | 10.9°          | 164.8°        | 175.7°         |

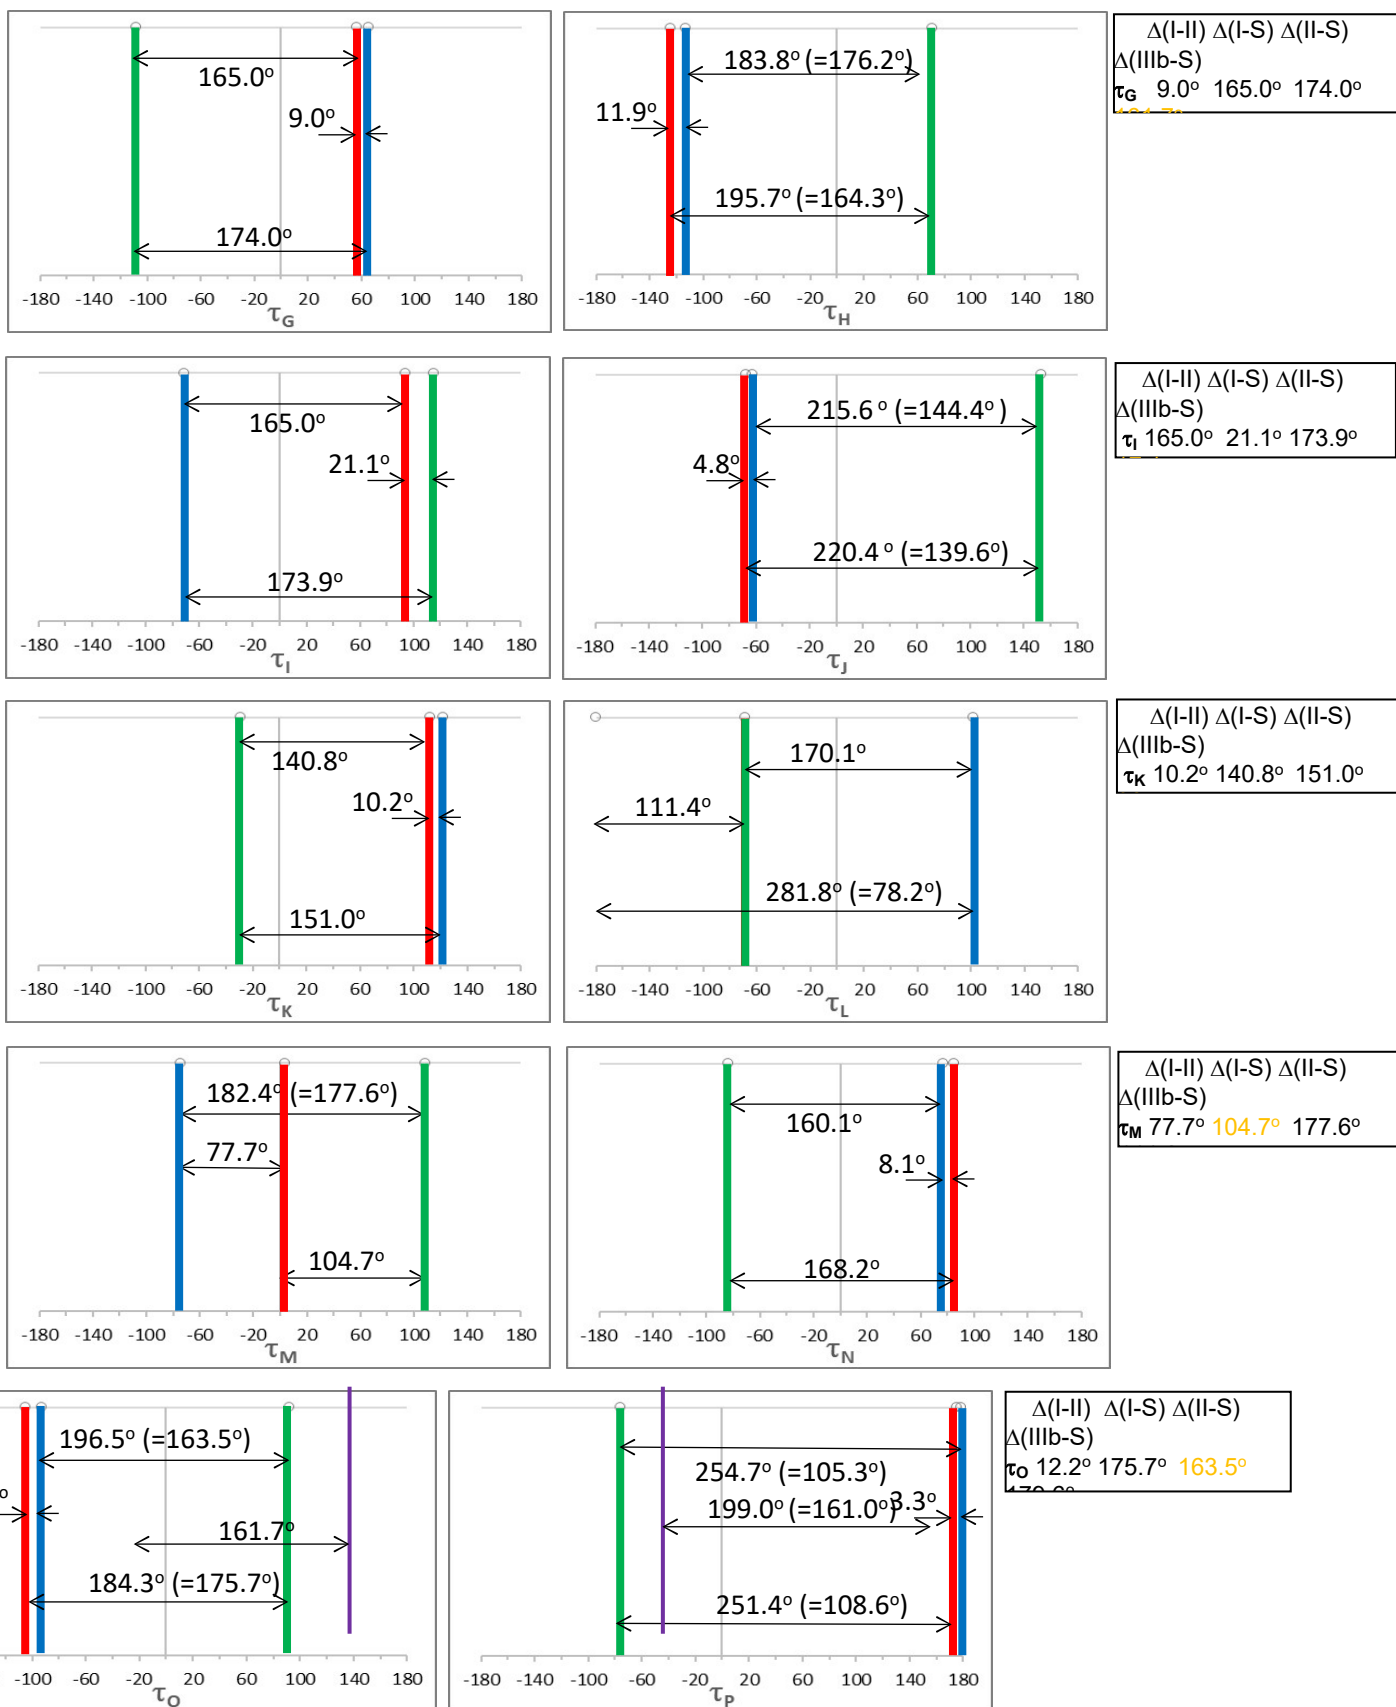

**Figure S5.** Torsion angles of 16 torsions ( $\tau_A$ ,  $\tau_B$ ,  $\tau_C$ ,  $\tau_D$ ,  $\tau_E$ ,  $\tau_F$ ,  $\tau_G$ ,  $\tau_H$ ,  $\tau_I$ ,  $\tau_J$ ,  $\tau_K$ ,  $\tau_L$ ,  $\tau_M$ ,  $\tau_N$ ,  $\tau_O$ ,  $\tau_P$ ) which have big differences between the new oxalate salt form (S) and forms I, II & IIIb. The red, blue, purple and green colours refer to form I, form II, form IIIb and new oxalate salt form (S), respectively.

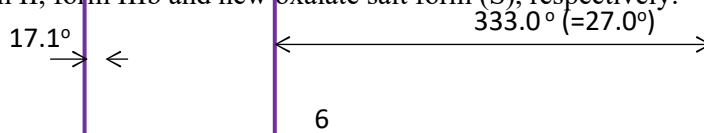

**Table S1.** The torsion angles (in degrees) of 16 torsions ( $\tau_A, \tau_B, \tau_C, \tau_D, \tau_E, \tau_F, \tau_G, \tau_H, \tau_I, \tau_J, \tau_K, \tau_L, \tau_M, \tau_N, \tau_O, \tau_P$ ) and their differences between the new oxalate salt form and forms I, II and IIIb.

| Torsion  | (a) Form I | (b) Form II | (c) Form IIIb | (d) Oxalate Salt Form <sup>(this study)</sup> | $\Delta(a-b)$ | $\Delta(a-d)$ | $\Delta(b-d)$ | $\Delta(c-d)$ |
|----------|------------|-------------|---------------|-----------------------------------------------|---------------|---------------|---------------|---------------|
| $\tau_A$ | -23.8      | 165.6       | 177.0         | 170.6                                         | 170.6         | 165.6         | 5.0           | 6.4           |
| $\tau_B$ | 71.0       | -72.8       | 46.1          | 48.5                                          | 143.8         | 22.5          | 121.3         | 2.4           |
| $\tau_C$ | 178.7      | -5.8        | 173.7         | -171.6                                        | 175.5         | 9.7           | 165.8         | 14.7          |
| $\tau_D$ | 55.9       | 168.3       | 173.3         | -175.4                                        | 112.4         | 128.7         | 16.3          | 11.3          |
| $\tau_E$ | -67.7      | -56.8       | -73.9         | 127.5                                         | 10.9          | 164.8         | 175.7         | 158.6         |
| $\tau_F$ | 110.8      | 124.6       | 104.6         | -53.3                                         | 13.8          | 164.1         | 177.9         | 157.9         |
| $\tau_G$ | 56.8       | 65.8        | 53.5          | -108.2                                        | 9.0           | 165.0         | 174.0         | 161.7         |
| $\tau_H$ | -124.7     | -112.8      | -128.0        | 71.0                                          | 11.9          | 164.3         | 176.2         | 161.0         |
| $\tau_I$ | 93.7       | -71.3       | 97.7          | 114.8                                         | 165.0         | 21.1          | 173.9         | 17.1          |
| $\tau_J$ | -67.1      | -62.3       | -179.7        | 153.3                                         | 4.8           | 139.6         | 144.4         | 27.0          |
| $\tau_K$ | 112.0      | 122.2       | 3.7           | -28.8                                         | 10.2          | 140.8         | 151.0         | 32.5          |
| $\tau_L$ | -179.8     | 102.0       | 33.7          | -68.4                                         | 78.2          | 111.4         | 170.4         | 102.1         |
| $\tau_M$ | 3.5        | -74.2       | -140.0        | 108.2                                         | 77.7          | 104.7         | 177.6         | 111.8         |
| $\tau_N$ | 84.7       | 76.6        | 89.5          | -83.5                                         | 8.1           | 168.2         | 160.1         | 173.0         |
| $\tau_O$ | -92.6      | -104.8      | -88.7         | 91.7                                          | 12.2          | 175.7         | 163.5         | 179.0         |
| $\tau_P$ | 175.4      | 178.7       | 166.2         | -76.0                                         | 3.3           | 108.6         | 105.3         | 117.8         |

Note that the definitions of 16 torsion angles for form I, form II, form IIIb and the new oxalate salt form can be found in **Figures S3** and **S5**.



S4. Hydrogen Bonding Network Analysis: Major hydrogen binding motifs of form IIIb and new salt form

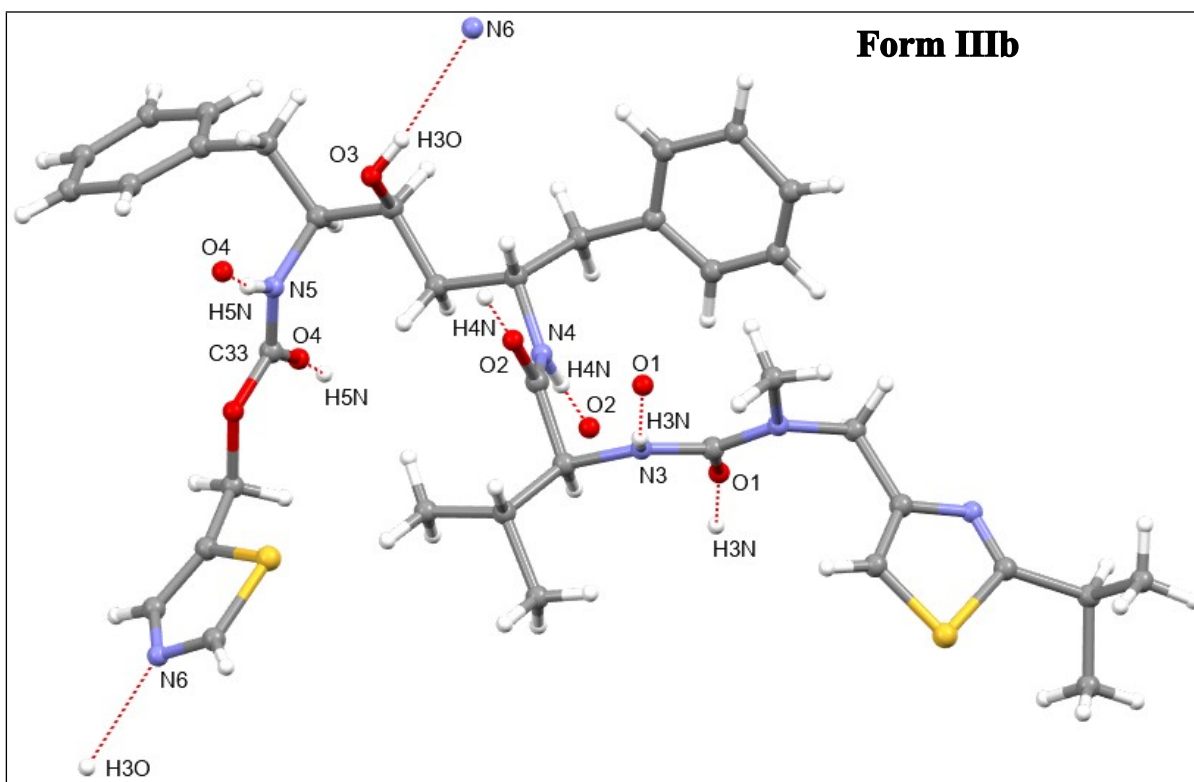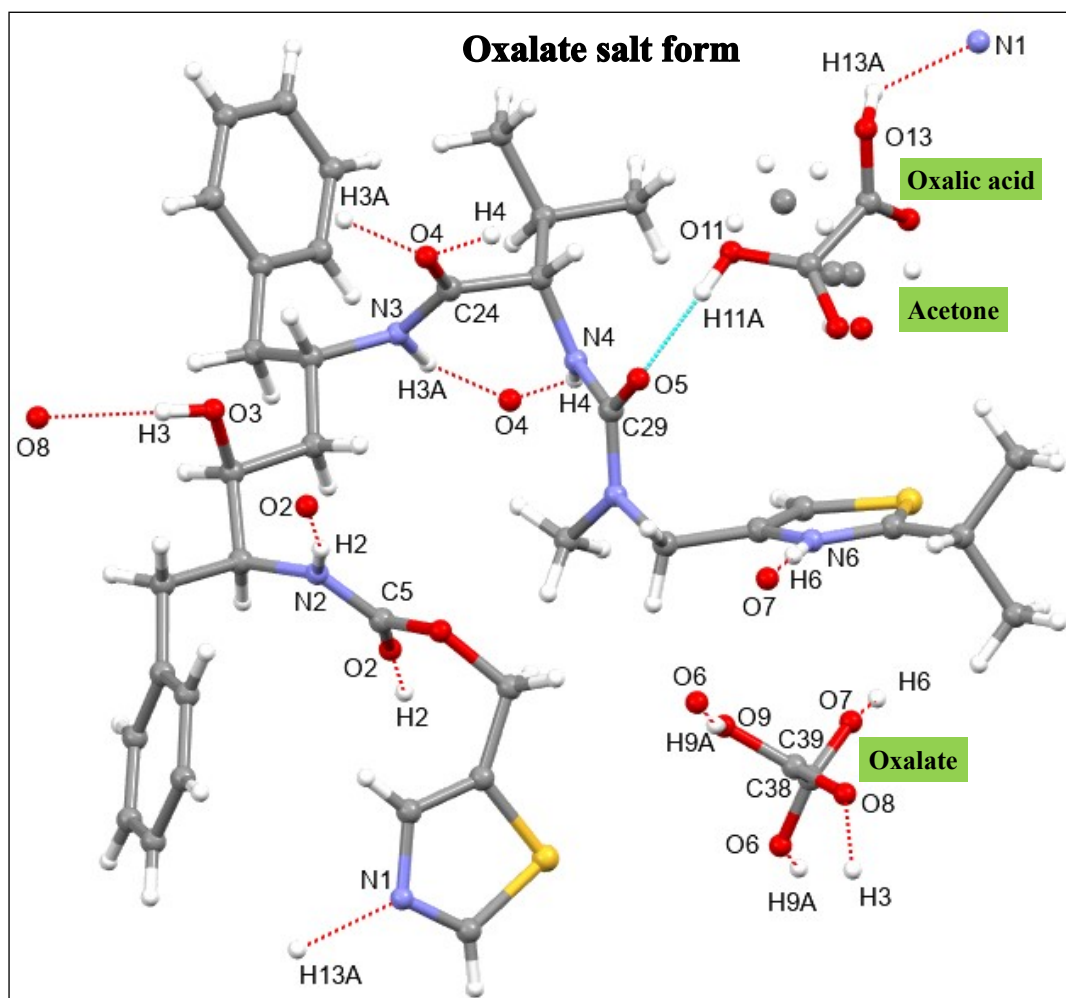

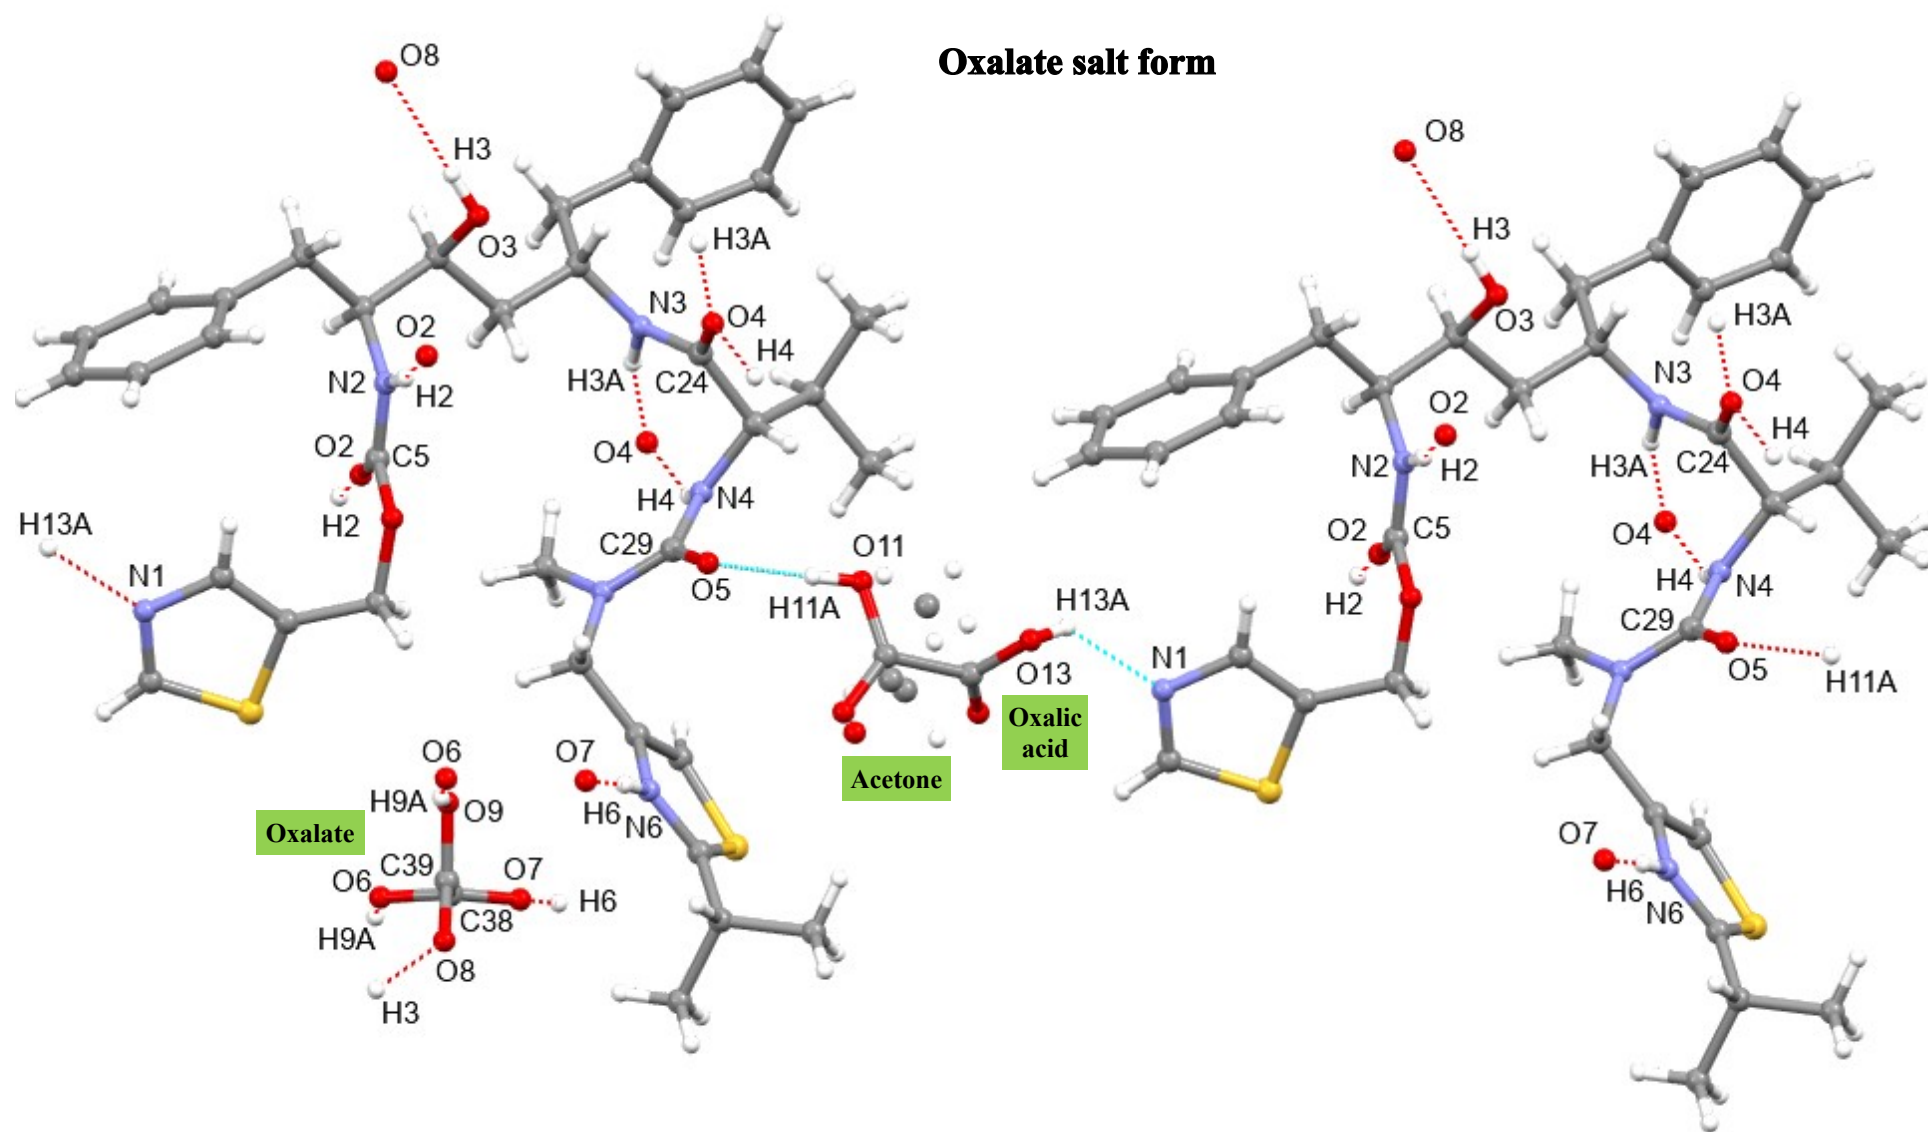

**Figure S6.** Four hydrogen bonds of form IIIb and Eight hydrogen bonds of ritonavir oxalate salt form as also listed in **Table 3**.

**(i) Form I vs. Form II**

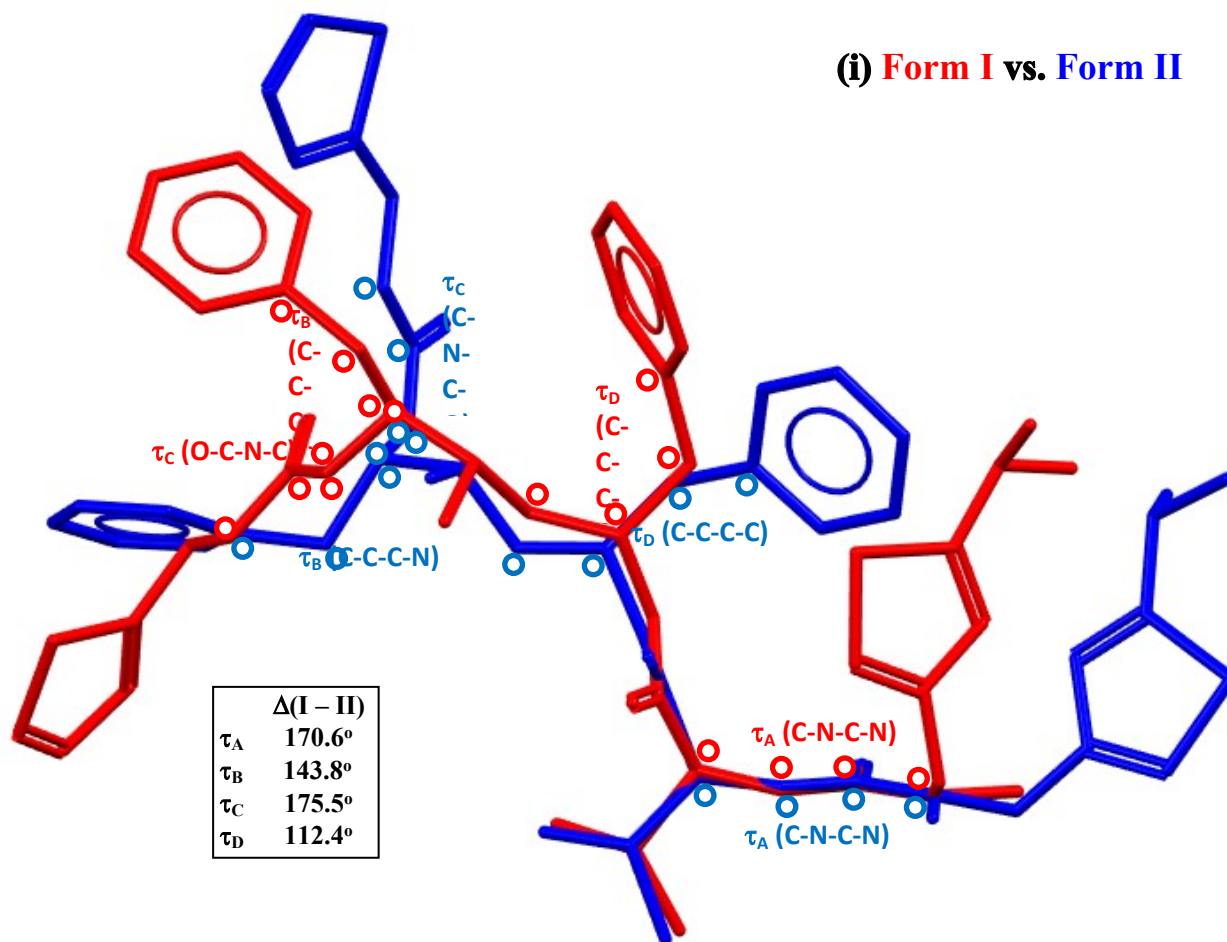

**(ii) Form I vs. Form IIIb**

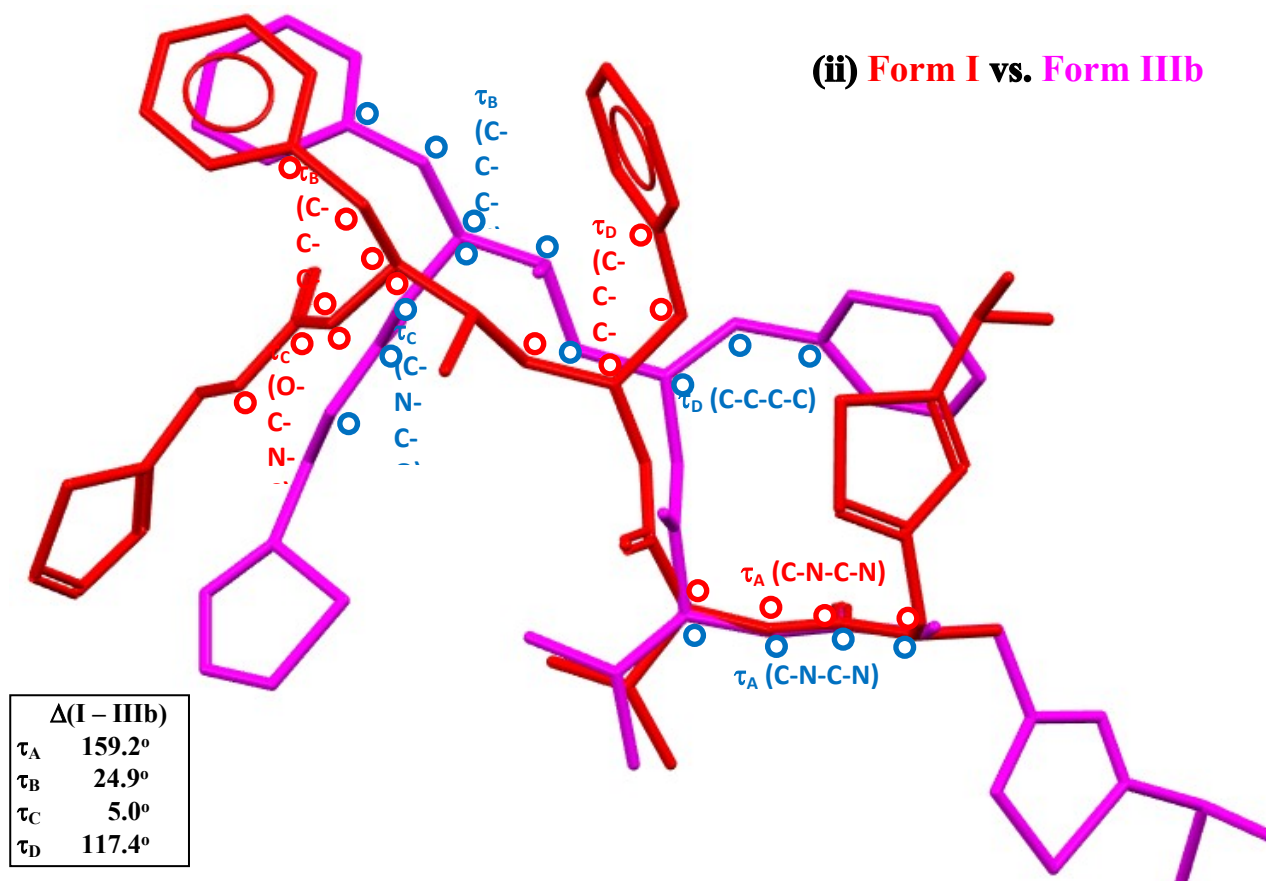

**(iii) Form I vs. Salt form**

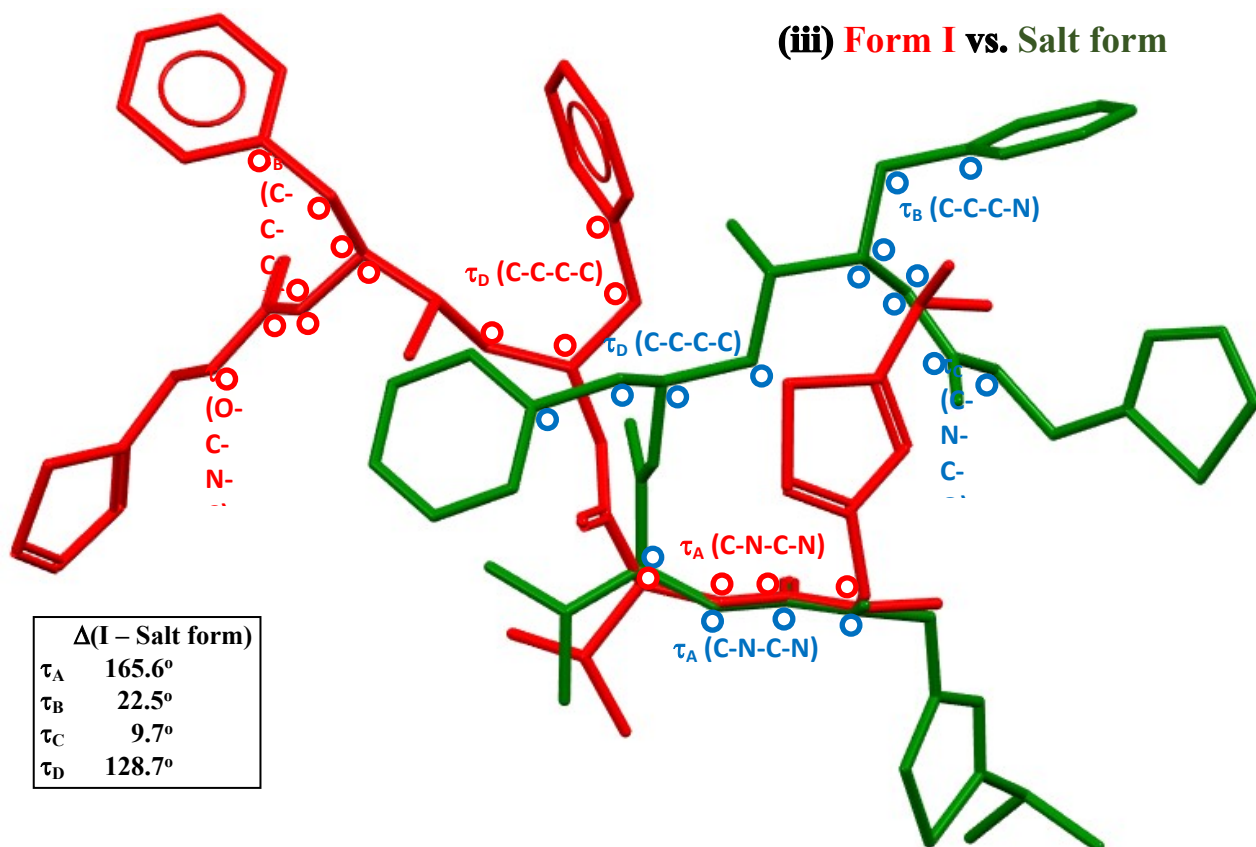

**(iv) Form II vs. Form IIIb**

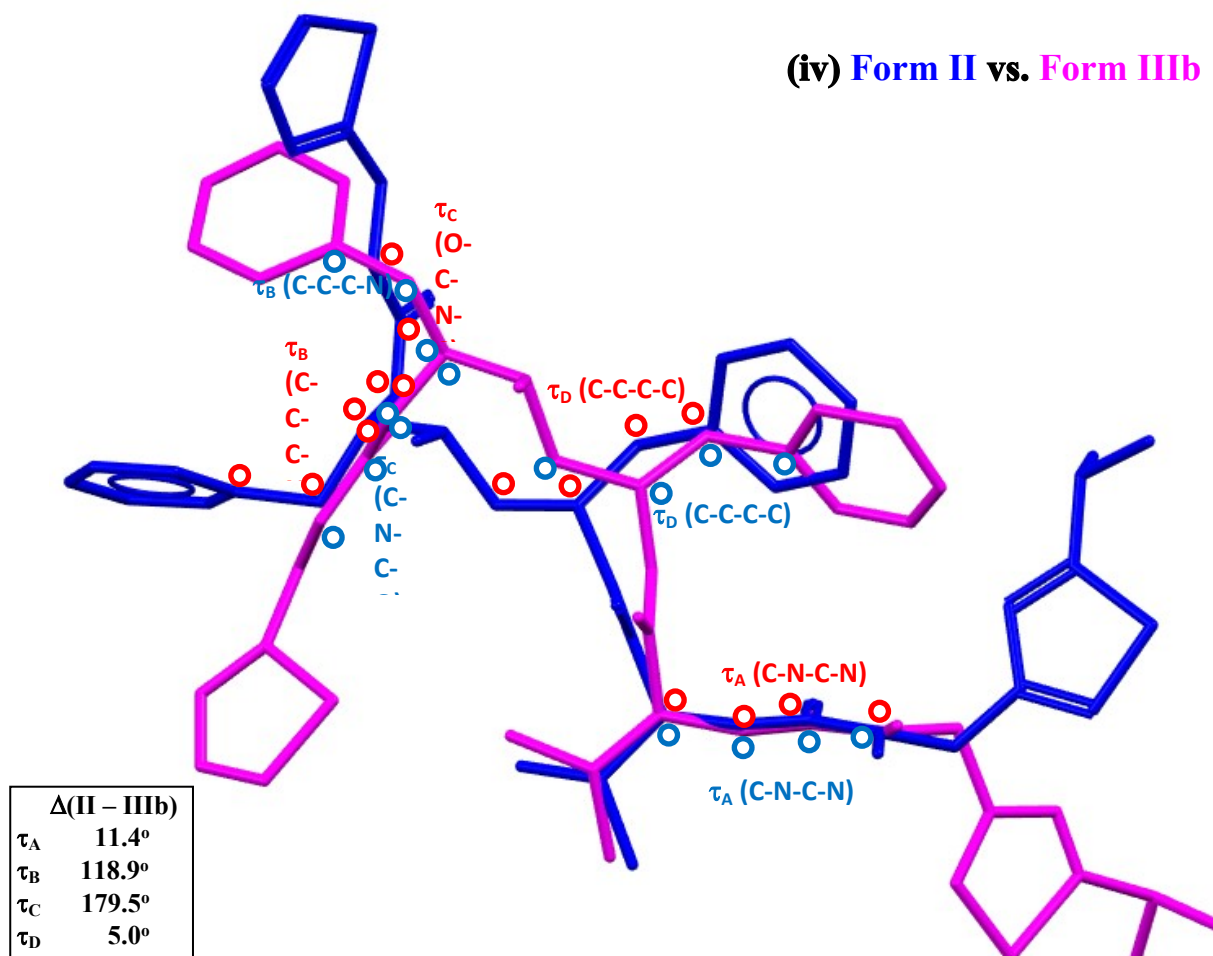

(v) Form II vs. Salt form

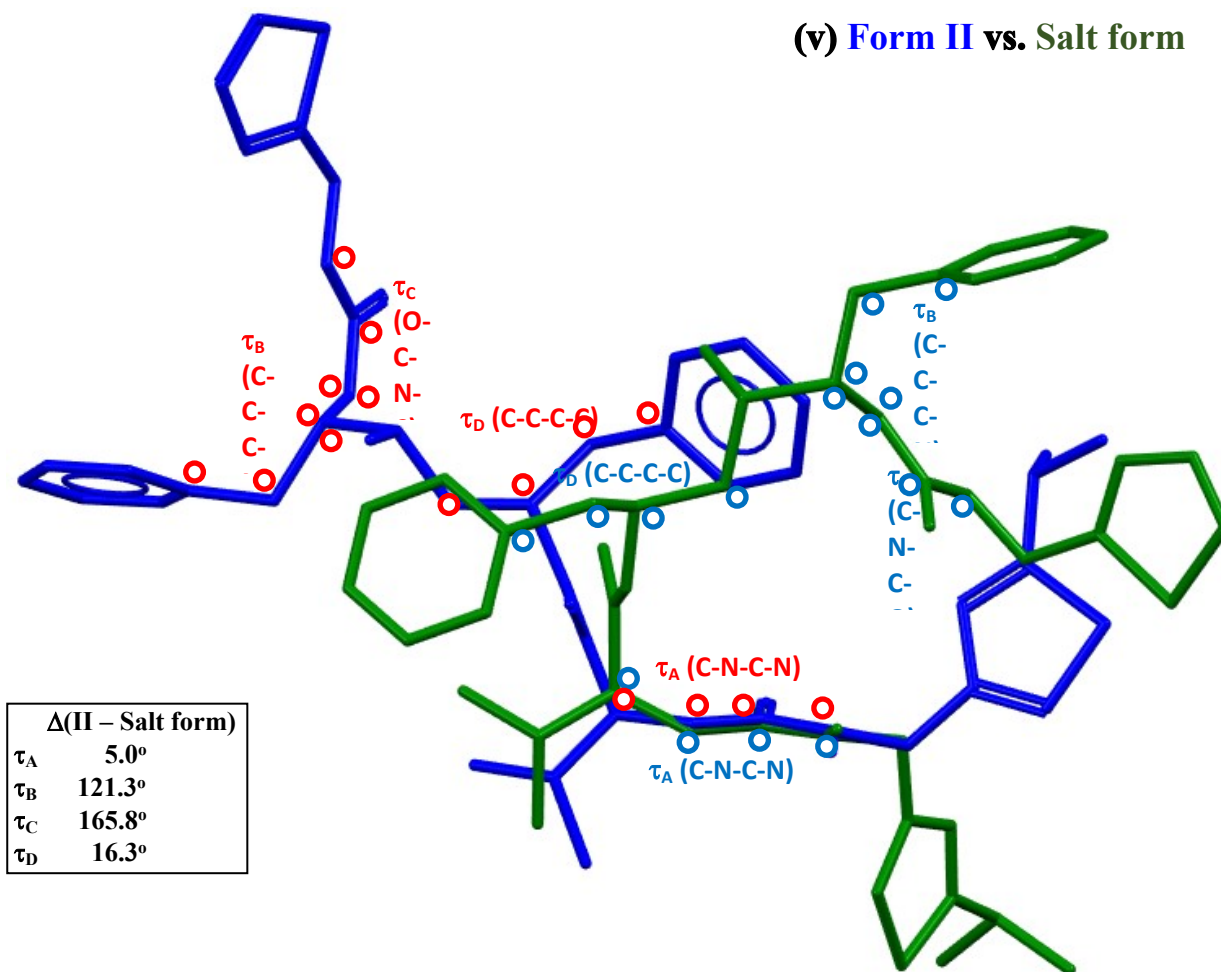

(vi) Form IIIb vs. Salt form

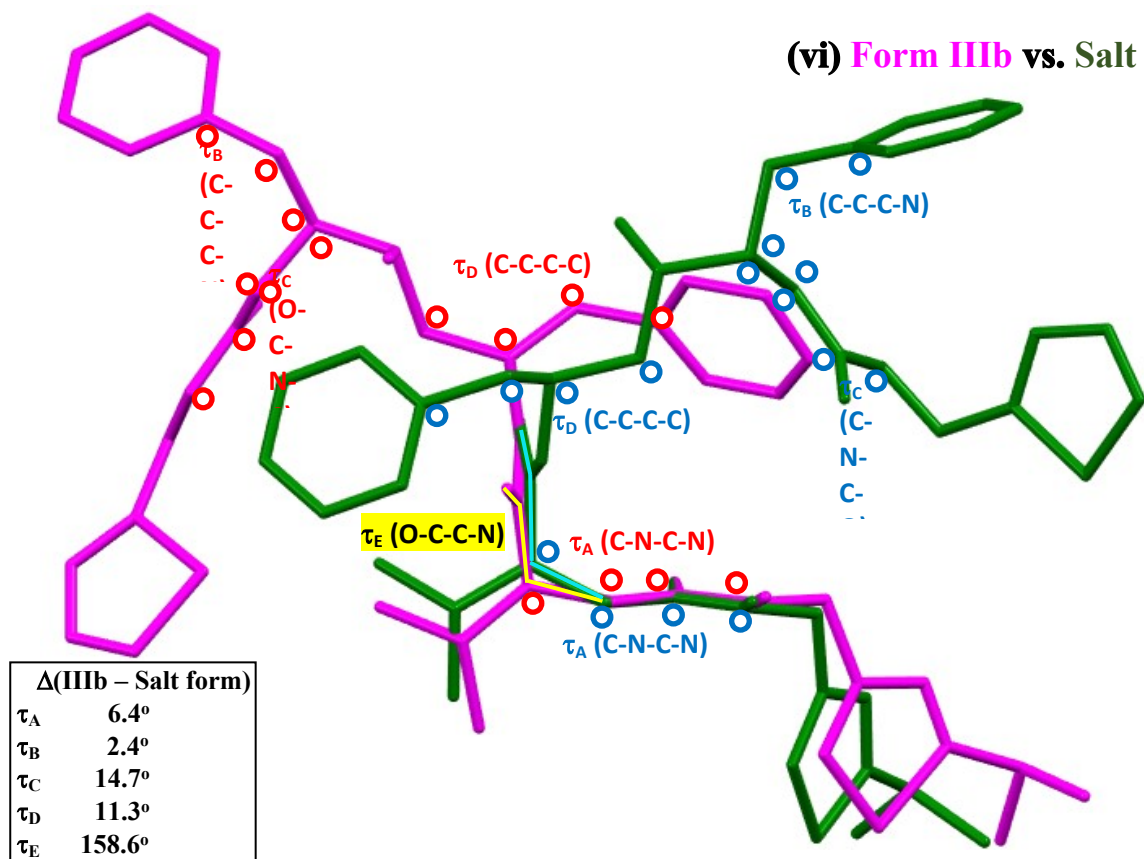

**Figure S7.** Comparisons of form I (red), form II (purple), form IIIb (magenta) and new oxalate salt form (green) with four torsions in red (form I, or II or IIIb), blue (oxalate salt form). Torsion  $\tau_E$  (C-N-C-N) in (vi) is highlighted as yellow.

There are other torsion angles ( $\tau_I, \tau_J, \tau_K, \tau_L, \tau_M, \tau_N, \tau_O, \tau_P$ ) which were found to exhibit large differences between these four forms and these are plotted in **Figure S5** and listed in **Table S1**. The torsions ( $\tau_I, \tau_J, \tau_K$ ) containing atoms from both thiazole 1 and  $\tau_A$  have torsional differences of  $21^\circ / 174^\circ$  between the oxalate salt form and form I / II with  $\Delta(I - II) = 165^\circ$ , and  $140^\circ / 144^\circ$  between oxalate salt form and form I / II with  $\Delta(I - II) = 5^\circ$ , and  $141^\circ / 151^\circ$  between oxalate salt form and form I / II with  $\Delta(I - II) = 10^\circ$  for torsions  $\tau_I, \tau_J$ , and  $\tau_K$ , respectively. This indicates that only  $\tau_I$  in the salt form is close to form I with large torsional angular differences being observed for the other cases. The similar comparisons of torsions ( $\tau_I, \tau_J, \tau_K$ ) revealed the similar trend (**Table S1**) for form IIIb with both form IIIb and oxalate salt form having  $< 33^\circ$  differences of these torsions. For the torsions ( $\tau_L, \tau_M$ ) related to Thiazole 1 and the isopropyl group, the isopropyl group in the oxalate salt form rotates about ( $105^\circ \sim 111^\circ$ ), ( $170^\circ \sim 178^\circ$ ) and ( $102^\circ \sim 112^\circ$ ) compared to these in form I, form II and form IIIb, respectively. As shown in **Table S1** and **Figure S5**, the torsions ( $\tau_N, \tau_O$ ) formed with the atoms from phenyl 1 and  $\tau_D$  in the oxalate salt form molecular conformation have about a  $160^\circ - 180^\circ$  angle of rotation compared to those in forms I, II and IIIb. The torsion ( $\tau_P$ ) of oxalate salt form determines the orientation of thiazole 2 which is  $\sim 110^\circ$  away from the orientation found in form I or II or IIIb (**Table S1** and **Figure S5**). Interestingly, as shown in **Figure S7(vi)**, the ureido and thiazole 1 functional groups are roughly overlaid between form IIIb and new oxalate salt form. However, the rest of the molecular structures (including amide, hydroxyl, carbamate, thiazole 2 and two aromatic rings) of form IIIb and oxalate salt form rotate about  $160^\circ$  to each other as evidencing by the torsion angle  $\tau_x$  in **Figure S7(vi)**.

**Table S2.** The calculated  $\Delta pK_a$  values for the functional groups in Ritonavir when using oxalic acid as a conformer / salt former, and % probability of co-crystal formation (AB) versus salt formation (A+ B-)

| Oxalic Acid pKa | Ritonavir Functional Group | pKa  | $\Delta pK_a$ | % AB probability (H-bond)* | % A+B- probability (Salt Formation)* |
|-----------------|----------------------------|------|---------------|----------------------------|--------------------------------------|
| 1.27            | Thiazole 1                 | 4.05 | 2.78          | 24.74                      | 75.26                                |
|                 | Thiazole 2                 | 1.1  | -0.17         | 74.89                      | 25.11                                |

\*Probability % calculated from linear equations presented in <sup>3</sup>

## References

1. J. Bauer, S. Spanton, R. Henry, J. Quick, W. Dziki, W. Porter and J. Morris, *Pharmaceutical Research*, 2001, **18**, 859-866.
2. X. Yao, R. F. Henry and G. G. Z. Zhang, *Journal of pharmaceutical sciences*, 2023, **112**, 237-242.
3. A. J. Cruz-Cabeza, *CrystEngComm*, 2012, **14**, 6362-6365.
